# Supplementary material for: Population Genetics of Plasmodium vivax in the Peruvian Amazon
Source: PubMed Central journal article supplement (PMC4713096; doi:10.1371/journal.pntd.0004376), 2016-01-14
Supplement: pntd.0004376.s001.pdf [file pntd.0004376.s001.pdf]

**S1 Table. Distribution and characteristics of *Plasmodium vivax* isolates by study areas and villages.** The composition of each study area is described in this table. The number of isolates (total n. of isolates=292), type of location, malaria control and/or intervention activities carried before our study sampling, median parasitemia (trophozoites/ $\mu$ l), median age and male/females ratio are described for each village and/or area.

| Area            | Village                | Abbrev. | Code | Isolates (n) | Location   | Intervention | Parasitemia           | Age (in years)           | Males:Females  |
|-----------------|------------------------|---------|------|--------------|------------|--------------|-----------------------|--------------------------|----------------|
| A1              | Manacamiri             | MN      | 1    | 46           | rural      | yes          |                       |                          |                |
|                 | Fray Martín            | FM      | 2    | 8            | rural      | yes          |                       |                          |                |
|                 | Santa Rita             | SR      | 3    | 28           | rural      | yes          |                       |                          |                |
|                 | Lupuna                 | LP      | 4    | 15           | rural      | yes          |                       |                          |                |
|                 | San Pedro              | SP      | 5    | 8            | rural      | yes          |                       |                          |                |
|                 | <b>total A1</b>        |         |      |              | 105 (36%)  |              |                       | 3280 (IQR 1173.5-5881.5) | 15 (IQR 10-37) |
| A2              | Porvenir               | POR     | 6    | 4            | peri-urban | yes          |                       |                          |                |
|                 | Aguaje                 | AG      | 7    | 2            | peri-urban | yes          |                       |                          |                |
|                 | Pampachica             | PP      | 8    | 1            | peri-urban | yes          |                       |                          |                |
|                 | Bella Luz              | BE      | 9    | 2            | urban      | yes          |                       |                          |                |
|                 | Claveles               | CL      | 10   | 1            | peri-urban | yes          |                       |                          |                |
|                 | Cardozo                | CAR     | 11   | 1            | urban      | yes          |                       |                          |                |
|                 | Palmeras               | PAL     | 12   | 1            | urban      | yes          |                       |                          |                |
|                 | Las Rosas              | LR      | 13   | 2            | peri-urban | yes          |                       |                          |                |
|                 | Villa Disnarda         | VD      | 14   | 2            | urban      | yes          |                       |                          |                |
|                 | Juan Carlos del Aguila | JCA     | 15   | 2            | peri-urban | yes          |                       |                          |                |
|                 | Mercedes               | ME      | 16   | 2            | peri-urban | yes          |                       |                          |                |
|                 | Amistad                | AMI     | 17   | 3            | peri-urban | yes          |                       |                          |                |
|                 | Progreso               | PRO     | 18   | 1            | peri-urban | yes          |                       |                          |                |
|                 | San Pablo de la Luz    | SPL     | 19   | 2            | peri-urban | yes          |                       |                          |                |
|                 | America                | AME     | 20   | 1            | urban      | yes          |                       |                          |                |
|                 | Simon Bolivar          | SB      | 21   | 3            | peri-urban | yes          |                       |                          |                |
|                 | Camelias               | CAM     | 22   | 1            | peri-urban | yes          |                       |                          |                |
|                 | Terminal               | TE      | 23   | 4            | urban      | yes          |                       |                          |                |
|                 | Villa Selva            | VS      | 24   | 27           | urban      | no           |                       |                          |                |
|                 | Ficus                  | FI      | 25   | 2            | urban      | yes          |                       |                          |                |
| San Julian      | SJ                     | 26      | 5    | urban        | yes        |              |                       |                          |                |
| Quistococha     | QUI                    | 27      | 1    | rural        | yes        |              |                       |                          |                |
| <b>total A2</b> |                        |         |      | 70 (24%)     |            |              | 4740 (IQR 2039-5570)  | 25.5 (IQR 13-42)         | 1.06           |
| A3              | Cruz del Sur           | CS      | 28   | 1            | rural      | yes          |                       |                          |                |
|                 | Delfines               | DE      | 29   | 4            | rural      | yes          |                       |                          |                |
|                 | Unión Progreso         | UP      | 30   | 2            | rural      | yes          |                       |                          |                |
|                 | Peña Negra             | PN      | 31   | 1            | rural      | yes          |                       |                          |                |
|                 | Varillal               | VA      | 32   | 21           | rural      | yes          |                       |                          |                |
|                 | 5 de Abril             | AB      | 33   | 3            | rural      | yes          |                       |                          |                |
| <b>total A3</b> |                        |         |      | 32 (11%)     |            |              | 2494.5 (IQR 870-5042) | 17 (IQR 12-28)           | 1.13           |

| Area            | Village           | Abbrev. | Code | Isolates (n) | Location | Intervention | Parasitemia            | Age (in years)   | Males:Females |
|-----------------|-------------------|---------|------|--------------|----------|--------------|------------------------|------------------|---------------|
| A4              | El Milagro        | MI      | 34   | 1            | rural    | yes          |                        |                  |               |
|                 | Villa Buen Pastor | VBP     | 35   | 15           | rural    | yes          |                        |                  |               |
|                 | San Carlos        | SC      | 36   | 36           | rural    | no           |                        |                  |               |
|                 | 3 de Octubre      | OC      | 37   | 3            | rural    | yes          |                        |                  |               |
| <b>total A4</b> |                   |         |      | 55 (18.8%)   |          |              | 3458 (IQR 1258.5-5280) | 21 (IQR 8-35)    | 1.12          |
| A5              | El Dorado         | DO      | 38   | 3            | rural    | yes          |                        |                  |               |
|                 | 13 de Febrero     | FE      | 39   | 5            | rural    | yes          |                        |                  |               |
|                 | Paujil zone I     | PAI     | 40   | 2            | rural    | yes          |                        |                  |               |
|                 | Paujil zone II    | PAII    | 41   | 2            | rural    | yes          |                        |                  |               |
|                 | Ex Petroleros     | PE      | 42   | 5            | rural    | yes          |                        |                  |               |
|                 | Nuevo Horizonte   | NH      | 43   | 3            | rural    | yes          |                        |                  |               |
|                 | San Lucas         | SL      | 44   | 4            | rural    | yes          |                        |                  |               |
|                 | El Triunfo        | TRI     | 45   | 4            | rural    | yes          |                        |                  |               |
|                 | La Habana         | LH      | 46   | 1            | rural    | yes          |                        |                  |               |
|                 | Cahuide           | CAH     | 47   | 1            | rural    | yes          |                        |                  |               |
| <b>total A5</b> |                   |         |      | 30 (10.3%)   |          |              | 3413.5 (IQR 1454-5502) | 21.5 (IQR 12-39) | 1.73          |
