# Supplementary material for: Population Genetics of Plasmodium vivax in the Peruvian Amazon
Source: PubMed Central journal article supplement (PMC4713096; doi:10.1371/journal.pntd.0004376), 2016-01-14
Supplement: pntd.0004376.s002.pdf [file pntd.0004376.s002.pdf]

**S2 Table. Allelic size range, expected heterozygosity (*He*) and efficiency of MS-PCR amplification of each locus.** The allelic size range is described in base pairs (bp). In this table, the level of polymorphism of each locus was described as the expected heterozygosity (*He*) calculated for each marker using pooled samples from all areas. The efficiency of amplification was calculated as the percentage of samples with positive PCR amplification for a specific locus over the total number of analysed samples (n=292).

| <b>locus</b> | <b>range (bp)</b> | <b><i>He</i></b> | <b>efficiency of amplification</b> |
|--------------|-------------------|------------------|------------------------------------|
| <b>MS1</b>   | 230-248           | 0.63             | 95.5%                              |
| <b>MS2</b>   | 189-237           | 0.79             | 93.2%                              |
| <b>MS3</b>   | 181-196           | 0.63             | 92.5%                              |
| <b>MS4</b>   | 188-215           | 0.70             | 89.7%                              |
| <b>MS5</b>   | 166-229           | 0.22             | 92.1%                              |
| <b>MS6</b>   | 209-248           | 0.86             | 89.7%                              |
| <b>MS7</b>   | 143-167           | 0.20             | 79.5%                              |
| <b>MS8</b>   | 205-340           | 0.92             | 84.9%                              |
| <b>MS9</b>   | 144-177           | 0.82             | 91.8%                              |
| <b>MS10</b>  | 178-268           | 0.66             | 84.6%                              |
| <b>MS12</b>  | 200-332           | 0.85             | 81.8%                              |
| <b>MS15</b>  | 232-289           | 0.85             | 82.9%                              |
| <b>MS16</b>  | 158-374           | 0.90             | 71.6%                              |
| <b>MS20</b>  | 191-254           | 0.88             | 84.9%                              |
