# Supplementary material for: Population Genetics of Plasmodium vivax in the Peruvian Amazon
Source: PubMed Central journal article supplement (PMC4713096; doi:10.1371/journal.pntd.0004376), 2016-01-14
Supplement: pntd.0004376.s003.pdf [file pntd.0004376.s003.pdf]

**S3 Table. List of the 87 unique *P. vivax* haplotypes found in the present study.**

| Haplotype | MS1 | MS2 | MS3 | MS4 | MS5 | MS6 | MS7 | MS8 | MS9 | MS10 | MS12 | MS15 | MS16 | MS20 |
|-----------|-----|-----|-----|-----|-----|-----|-----|-----|-----|------|------|------|------|------|
| 1         | 1   | 1   | 2   | 6   | 3   | 8   | 1   | 10  | 2   | 4    | 5    | 6    | 11   | 5    |
| 2         | 1   | 2   | 2   | 6   | 3   | 6   | 1   | 9   | 7   | 7    | 8    | 5    | 21   | 3    |
| 3         | 1   | 2   | 4   | 2   | 2   | 9   | 1   | 6   | 2   | 1    | 10   | 4    | 10   | 13   |
| 4         | 1   | 4   | 1   | 3   | 3   | 3   | 1   | 7   | 6   | 6    | 1    | 5    | 13   | 8    |
| 5         | 1   | 9   | 2   | 2   | 3   | 6   | 1   | 11  | 7   | 7    | 12   | 8    | 13   | 8    |
| 6         | 2   | 1   | 1   | 2   | 3   | 4   | 1   | 7   | 6   | 11   | 1    | 8    | 3    | 6    |
| 7         | 2   | 1   | 1   | 2   | 3   | 4   | 1   | 7   | 6   | 11   | 4    | 5    | 8    | 6    |
| 8         | 2   | 1   | 1   | 2   | 3   | 4   | 1   | 19  | 6   | 11   | 4    | 8    | 3    | 6    |
| 9         | 2   | 1   | 1   | 2   | 3   | 4   | 1   | 21  | 6   | 6    | 4    | 8    | 3    | 6    |
| 10        | 2   | 1   | 2   | 2   | 3   | 4   | 1   | 19  | 6   | 6    | 4    | 8    | 3    | 9    |
| 11        | 2   | 1   | 3   | 2   | 3   | 3   | 1   | 17  | 6   | 2    | 5    | 5    | 3    | 6    |
| 12        | 2   | 1   | 3   | 2   | 3   | 4   | 1   | 7   | 6   | 11   | 4    | 5    | 8    | 6    |
| 13        | 2   | 1   | 3   | 2   | 3   | 4   | 1   | 17  | 6   | 11   | 5    | 9    | 3    | 9    |
| 14        | 2   | 1   | 3   | 2   | 3   | 4   | 1   | 19  | 6   | 11   | 4    | 8    | 3    | 6    |
| 15        | 2   | 1   | 3   | 2   | 3   | 4   | 1   | 19  | 6   | 11   | 4    | 8    | 3    | 9    |
| 16        | 2   | 1   | 3   | 2   | 3   | 4   | 1   | 19  | 10  | 11   | 4    | 8    | 8    | 9    |
| 17        | 2   | 1   | 3   | 2   | 3   | 6   | 1   | 17  | 10  | 2    | 5    | 5    | 3    | 6    |
| 18        | 2   | 4   | 2   | 1   | 1   | 4   | 1   | 8   | 3   | 6    | 1    | 3    | 3    | 4    |
| 19        | 2   | 4   | 2   | 2   | 3   | 1   | 1   | 7   | 4   | 11   | 4    | 8    | 16   | 1    |
| 20        | 2   | 4   | 2   | 2   | 3   | 1   | 1   | 19  | 6   | 11   | 4    | 8    | 3    | 9    |
| 21        | 2   | 4   | 3   | 5   | 3   | 1   | 1   | 7   | 4   | 11   | 9    | 5    | 16   | 9    |
| 22        | 2   | 6   | 1   | 1   | 3   | 6   | 1   | 8   | 8   | 6    | 7    | 5    | 19   | 5    |
| 23        | 2   | 6   | 1   | 2   | 3   | 4   | 1   | 7   | 4   | 11   | 1    | 8    | 16   | 1    |
| 24        | 2   | 6   | 1   | 2   | 3   | 4   | 1   | 19  | 6   | 11   | 1    | 8    | 3    | 9    |
| 25        | 2   | 6   | 1   | 2   | 3   | 4   | 1   | 19  | 10  | 11   | 1    | 8    | 8    | 9    |
| 26        | 2   | 6   | 1   | 4   | 1   | 3   | 1   | 4   | 10  | 6    | 12   | 5    | 6    | 4    |
| 27        | 2   | 6   | 3   | 2   | 3   | 3   | 1   | 5   | 1   | 8    | 10   | 1    | 9    | 9    |
| 28        | 2   | 6   | 3   | 4   | 1   | 3   | 1   | 20  | 1   | 8    | 9    | 8    | 3    | 4    |
| 29        | 2   | 6   | 3   | 4   | 1   | 3   | 1   | 20  | 1   | 8    | 10   | 8    | 3    | 4    |
| 30        | 3   | 4   | 2   | 1   | 3   | 6   | 1   | 8   | 7   | 8    | 5    | 6    | 3    | 6    |
| 31        | 4   | 1   | 2   | 1   | 2   | 5   | 1   | 6   | 6   | 7    | 2    | 6    | 3    | 5    |
| 32        | 4   | 1   | 2   | 2   | 3   | 7   | 1   | 10  | 7   | 7    | 13   | 6    | 7    | 5    |
| 33        | 4   | 1   | 2   | 2   | 3   | 7   | 1   | 10  | 7   | 7    | 14   | 6    | 7    | 5    |
| 34        | 4   | 1   | 2   | 2   | 3   | 8   | 2   | 9   | 7   | 7    | 12   | 5    | 8    | 5    |
| 35        | 4   | 1   | 2   | 2   | 3   | 8   | 2   | 12  | 7   | 7    | 12   | 5    | 8    | 5    |
| 36        | 4   | 1   | 3   | 1   | 2   | 4   | 1   | 8   | 5   | 7    | 4    | 3    | 20   | 6    |
| 37        | 4   | 1   | 4   | 2   | 3   | 4   | 1   | 20  | 5   | 7    | 5    | 9    | 3    | 10   |
| 38        | 4   | 1   | 4   | 2   | 3   | 4   | 1   | 20  | 6   | 10   | 5    | 9    | 3    | 10   |
| 39        | 4   | 1   | 4   | 2   | 3   | 5   | 1   | 22  | 6   | 5    | 13   | 2    | 10   | 7    |
| 40        | 4   | 1   | 4   | 2   | 3   | 5   | 1   | 22  | 6   | 10   | 5    | 10   | 3    | 10   |
| 41        | 4   | 1   | 4   | 2   | 3   | 7   | 1   | 18  | 5   | 3    | 6    | 6    | 3    | 7    |

|    |   |   |   |   |   |   |   |    |    |    |    |    |    |    |
|----|---|---|---|---|---|---|---|----|----|----|----|----|----|----|
| 42 | 4 | 1 | 4 | 4 | 3 | 1 | 1 | 6  | 2  | 10 | 11 | 1  | 3  | 3  |
| 43 | 4 | 3 | 2 | 1 | 3 | 7 | 1 | 10 | 10 | 7  | 5  | 8  | 4  | 7  |
| 44 | 4 | 4 | 2 | 1 | 3 | 7 | 1 | 10 | 5  | 7  | 6  | 8  | 4  | 7  |
| 45 | 4 | 4 | 2 | 1 | 3 | 8 | 1 | 11 | 10 | 7  | 6  | 9  | 4  | 7  |
| 46 | 4 | 4 | 2 | 2 | 3 | 7 | 1 | 10 | 7  | 7  | 13 | 6  | 7  | 5  |
| 47 | 4 | 4 | 2 | 3 | 3 | 8 | 1 | 8  | 6  | 7  | 5  | 8  | 10 | 12 |
| 48 | 4 | 4 | 2 | 3 | 3 | 8 | 2 | 8  | 6  | 7  | 5  | 8  | 23 | 12 |
| 49 | 4 | 4 | 2 | 3 | 3 | 9 | 1 | 7  | 6  | 7  | 4  | 7  | 22 | 12 |
| 50 | 4 | 4 | 2 | 6 | 3 | 7 | 1 | 1  | 10 | 7  | 6  | 6  | 10 | 6  |
| 51 | 4 | 4 | 2 | 6 | 3 | 7 | 1 | 2  | 10 | 7  | 6  | 6  | 10 | 6  |
| 52 | 4 | 4 | 3 | 6 | 3 | 4 | 1 | 9  | 2  | 7  | 2  | 6  | 19 | 5  |
| 53 | 4 | 5 | 3 | 1 | 2 | 1 | 1 | 9  | 5  | 7  | 5  | 10 | 23 | 5  |
| 54 | 4 | 5 | 3 | 1 | 2 | 2 | 1 | 7  | 5  | 7  | 4  | 8  | 20 | 5  |
| 55 | 4 | 5 | 3 | 2 | 3 | 1 | 1 | 8  | 5  | 10 | 5  | 9  | 16 | 2  |
| 56 | 4 | 5 | 3 | 2 | 3 | 2 | 1 | 7  | 5  | 7  | 4  | 8  | 17 | 2  |
| 57 | 4 | 5 | 3 | 2 | 3 | 2 | 1 | 7  | 5  | 13 | 4  | 8  | 17 | 2  |
| 58 | 4 | 6 | 2 | 1 | 3 | 3 | 2 | 14 | 3  | 5  | 5  | 2  | 15 | 11 |
| 59 | 4 | 6 | 2 | 1 | 3 | 7 | 1 | 7  | 9  | 7  | 15 | 5  | 17 | 6  |
| 60 | 4 | 6 | 2 | 1 | 3 | 7 | 1 | 11 | 2  | 7  | 3  | 11 | 1  | 6  |
| 61 | 4 | 6 | 2 | 1 | 3 | 7 | 1 | 12 | 4  | 11 | 7  | 1  | 2  | 12 |
| 62 | 4 | 6 | 2 | 1 | 3 | 8 | 1 | 14 | 9  | 7  | 7  | 6  | 18 | 6  |
| 63 | 4 | 6 | 2 | 2 | 3 | 4 | 1 | 8  | 6  | 10 | 2  | 6  | 8  | 7  |
| 64 | 4 | 6 | 2 | 2 | 3 | 4 | 1 | 20 | 3  | 10 | 2  | 9  | 8  | 10 |
| 65 | 4 | 6 | 2 | 2 | 3 | 4 | 1 | 20 | 4  | 10 | 2  | 9  | 8  | 10 |
| 66 | 4 | 6 | 2 | 2 | 3 | 4 | 2 | 10 | 7  | 7  | 5  | 6  | 3  | 3  |
| 67 | 4 | 6 | 2 | 4 | 2 | 3 | 1 | 16 | 6  | 10 | 2  | 8  | 3  | 9  |
| 68 | 4 | 6 | 2 | 5 | 3 | 3 | 1 | 11 | 7  | 7  | 2  | 2  | 7  | 2  |
| 69 | 4 | 6 | 3 | 6 | 3 | 6 | 1 | 11 | 6  | 5  | 4  | 6  | 14 | 10 |
| 70 | 4 | 6 | 4 | 4 | 2 | 3 | 1 | 6  | 2  | 9  | 11 | 1  | 3  | 10 |
| 71 | 4 | 6 | 4 | 4 | 2 | 3 | 1 | 20 | 2  | 9  | 11 | 9  | 3  | 5  |
| 72 | 4 | 8 | 3 | 2 | 3 | 4 | 1 | 8  | 5  | 11 | 2  | 8  | 18 | 10 |
| 73 | 4 | 8 | 3 | 2 | 3 | 5 | 1 | 9  | 5  | 10 | 2  | 4  | 18 | 6  |
| 74 | 5 | 1 | 2 | 1 | 1 | 3 | 1 | 8  | 4  | 6  | 4  | 3  | 19 | 6  |
| 75 | 5 | 1 | 2 | 1 | 3 | 6 | 1 | 9  | 6  | 7  | 5  | 8  | 7  | 7  |
| 76 | 5 | 2 | 2 | 2 | 2 | 7 | 1 | 6  | 2  | 7  | 2  | 6  | 10 | 12 |
| 77 | 5 | 4 | 1 | 1 | 3 | 6 | 1 | 12 | 6  | 6  | 3  | 7  | 10 | 5  |
| 78 | 5 | 4 | 2 | 4 | 2 | 7 | 1 | 13 | 10 | 10 | 13 | 9  | 18 | 7  |
| 79 | 5 | 5 | 2 | 3 | 3 | 3 | 1 | 9  | 7  | 7  | 2  | 6  | 5  | 9  |
| 80 | 5 | 7 | 3 | 7 | 3 | 1 | 1 | 3  | 7  | 11 | 4  | 6  | 12 | 7  |
| 81 | 6 | 1 | 3 | 2 | 3 | 3 | 1 | 15 | 10 | 7  | 5  | 9  | 19 | 7  |
| 82 | 6 | 2 | 1 | 1 | 3 | 8 | 1 | 13 | 7  | 7  | 4  | 6  | 10 | 6  |
| 83 | 6 | 2 | 2 | 1 | 3 | 8 | 2 | 12 | 7  | 12 | 3  | 5  | 3  | 8  |
| 84 | 6 | 2 | 3 | 1 | 3 | 8 | 1 | 6  | 7  | 7  | 4  | 6  | 10 | 6  |
| 85 | 6 | 2 | 3 | 1 | 3 | 8 | 1 | 13 | 7  | 7  | 4  | 6  | 10 | 6  |
| 86 | 6 | 4 | 2 | 1 | 3 | 8 | 1 | 12 | 7  | 7  | 4  | 8  | 10 | 6  |
| 87 | 6 | 5 | 2 | 3 | 3 | 7 | 1 | 13 | 7  | 7  | 2  | 8  | 13 | 7  |
