# Supplementary material for: Population Genetics of Plasmodium vivax in the Peruvian Amazon
Source: PubMed Central journal article supplement (PMC4713096; doi:10.1371/journal.pntd.0004376), 2016-01-14
Supplement: pntd.0004376.s004.pdf [file pntd.0004376.s004.pdf]

**S4 Table. Marginal log-likelihood (log mL) and log Bayes factors (LBF) values used to rank the models in Fig.7.** The models were constructed considering 5, 3 and 1 populations evaluating from 1 to 14 combined parameters (Θ and M) using MIGRATE-N.

| Model       | n. of populations   | n. of parameters | log mL          | LBF            | Rank     |
|-------------|---------------------|------------------|-----------------|----------------|----------|
| <b>XIII</b> | <b>1 (panmixia)</b> | <b>1</b>         | <b>-47467.4</b> | <b>0</b>       | <b>1</b> |
| <b>XI</b>   | <b>3</b>            | <b>6</b>         | <b>-331455</b>  | <b>-283988</b> | <b>2</b> |
| <b>III</b>  | <b>5</b>            | <b>13</b>        | <b>-721627</b>  | <b>-674159</b> | <b>3</b> |
| V           | 5                   | 13               | -756949         | -709481        | 4        |
| VII         | 5                   | 12               | -787236         | -739768        | 5        |
| II          | 5                   | 14               | -791710         | -744242        | 6        |
| IV          | 5                   | 13               | -819337         | -771870        | 7        |
| VI          | 5                   | 12               | -873472         | -826004        | 8        |
| X           | 4                   | 10               | -877141         | -829674        | 9        |
| IX          | 4                   | 9                | -969912         | -922445        | 10       |
| I           | 5                   | 13               | -984735         | -937267        | 11       |
| XII         | 3                   | 7                | -1180472        | -1133005       | 12       |
| VIII        | 5                   | 11               | -1858279        | -1810811       | 13       |

**n. of populations:** 1 population: all areas considered as one population (panmixia); 3 populations: A1, A2+A3+A5, A4; 5 populations: A1, A2,A3, A4, A5. Model XIII reached the highest model probability (>99.99%) while the others models close to 0.
