# Supplementary material for: Population Genetics of Plasmodium vivax in the Peruvian Amazon
Source: PubMed Central journal article supplement (PMC4713096; doi:10.1371/journal.pntd.0004376), 2016-01-14
Supplement: pntd.0004376.s005.pdf [file pntd.0004376.s005.pdf]

**S5 Table. Estimates of the migration parameters for the three best migration models: mutation scaled population size ( $\Theta$ ) and mutation scaled migration rates ( $M$ ).**

| Model                   | Parameter                       | Mode | Median      | 95% credibility interval |
|-------------------------|---------------------------------|------|-------------|--------------------------|
| XIII (panmixia)         | $\Theta_{(A1+A2+A3+A4+A5)}$     | 5.1  | 5.23        | 3.07 - 7.13              |
| XI (3 populations)      | $\Theta_{A1}$                   | 1.7  | 1.83        | 0.07 - 3.4               |
|                         | $\Theta_{(A2+A3+A5)}$           | 0.57 | 1.03        | 0 - 2.2                  |
|                         | $\Theta_{A4}$                   | 1.17 | 1.97        | 0 - 7.87                 |
|                         | $M_{(A2+A3+A5) \rightarrow A1}$ | 2.9  | 2.97        | 1.07 - 4.67              |
|                         | $M_{A1 \rightarrow (A2+A3+A5)}$ | 2.97 | 3.1         | 0.33 - 5.6               |
|                         | $M_{(A2+A3+A5) \rightarrow A4}$ | 0.77 | 1.57        | 0 - 2.93                 |
| III (5 populations)     | $\Theta_{A1}$                   | 0.90 | 1.30        | 0 - 2.6                  |
|                         | $\Theta_{A2}$                   | 0.03 | 0.63        | 0 - 1.73                 |
|                         | $\Theta_{A3}$                   | 6.57 | 6.70        | 4.13 - 8.8               |
|                         | $\Theta_{A4}$                   | 0.03 | 0.77        | 0 - 1.93                 |
|                         | $\Theta_{A5}$                   | 1.43 | 1.63        | 0 - 3.07                 |
|                         | $M_{A2 \rightarrow A1}$         | 1.57 | 1.70        | 0 - 3.2                  |
|                         | $M_{A1 \rightarrow A2}$         | 0.77 | 1.37        | 0 - 5.47                 |
|                         | $M_{A3 \rightarrow A2}$         | 2.50 | 3.23        | 0 - 13.27                |
|                         | $M_{A5 \rightarrow A2}$         | 3.10 | 3.23        | 0.87 - 5.33              |
|                         | $M_{A2 \rightarrow A3}$         | 9.30 | 9.57        | 6.93 - 13.33             |
| $M_{A2 \rightarrow A4}$ | 7.43                            | 7.90 | 4.93 - 12.4 |                          |
| $M_{A1 \rightarrow A5}$ | 0.90                            | 1.30 | 0 - 3.27    |                          |
| $M_{A2 \rightarrow A5}$ | 1.17                            | 1.57 | 0 - 3.27    |                          |
