# Supplementary material for: Population Genetics of Plasmodium vivax in the Peruvian Amazon
Source: PubMed Central journal article supplement (PMC4713096; doi:10.1371/journal.pntd.0004376), 2016-01-14

**S1 Fig. Mantel test for Isolation-by-Distance.** Mantel test for Matrix Correspondence was performed using GenAlEx to test the occurrence of a positive correlation ( $R_{xy}>0$ ) between the genetic  $PHI_{PT}$  matrix and geographic distances, so called the Isolation-by-distance (IBD) hypothesis. The genetic and geographic distance were not correlated ( $R_{xy}=-0.41$   $p=0.17$ ).

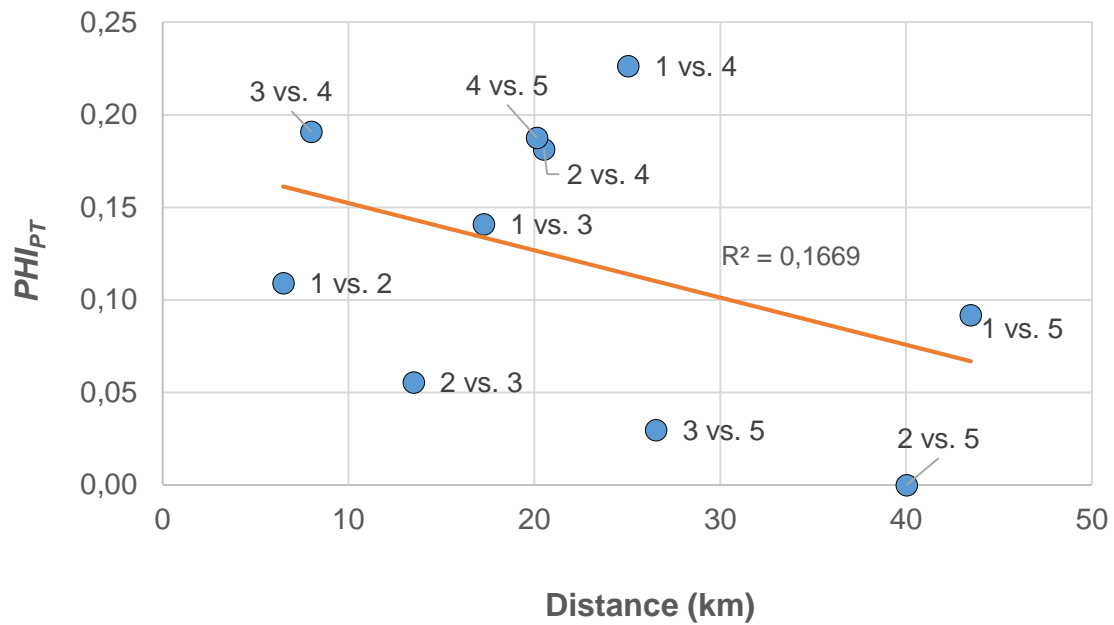

Supplement: pntd.0004376.s006.pdf [file pntd.0004376.s006.pdf]
