# Supplementary material for: Population Genetics of Plasmodium vivax in the Peruvian Amazon
Source: PubMed Central journal article supplement (PMC4713096; doi:10.1371/journal.pntd.0004376), 2016-01-14
Supplement: pntd.0004376.s008.pdf [file pntd.0004376.s008.pdf]

**S3 Fig. Detection of recent bottleneck or expansion events in the parasite population.** The distribution of the number of alleles and *He* has been obtained simulating the coalescence of the microsatellite sequences under three mutational models: IAM, TPM and SMM. The Wilcoxon sign-rank test was used to determine whether a population exhibits a significant number of loci with *He* excess or deficiency (Refs. 1,2). The black cells denote that the parasite population has suffered a recent bottleneck and/or expansion (*He* excess and/or deficit;  $p < 0.05$ ) while the white cells denote non-significant evidence. The models were run in BOTTLENECK using 10,000 replications using all 10 microsatellites and later in a partitioned analysis (imperfect and perfect MS analysed separately). The two-Phase model was evaluated using all 10 MS by fractionating the proportion of SMM in TPM by 5, 15, 50, 70 and 95% and a variance of 30. A5 was not included due to small sample size (A5: n=4 haplotypes). Partitioned analysis was run considering 70%SSM in TPM with variance=30 and for 10,000 replicates. Overall results are presented on the smallest table.

**BOTTLENECK simulations run under different parameters**

| Area          | Mutational model | <i>He</i> | for TPM (%SSM) |    |    |    |    | Partitioned analysis |       |
|---------------|------------------|-----------|----------------|----|----|----|----|----------------------|-------|
|               |                  |           | 5              | 15 | 50 | 70 | 95 | Imp.                 | Perf. |
| A1<br>(n=120) | IAM              | def.      |                |    |    |    |    |                      |       |
|               |                  | exc.      |                |    |    |    |    |                      |       |
|               | TPM              | def.      |                |    |    |    |    |                      |       |
|               |                  | exc.      |                |    |    |    |    |                      |       |
|               | SMM              | def.      |                |    |    |    |    |                      |       |
|               |                  | exc.      |                |    |    |    |    |                      |       |
| A2<br>(n=32)  | IAM              | def.      |                |    |    |    |    |                      |       |
|               |                  | exc.      |                |    |    |    |    |                      |       |
|               | TPM              | def.      |                |    |    |    |    |                      |       |
|               |                  | exc.      |                |    |    |    |    |                      |       |
|               | SMM              | def.      |                |    |    |    |    |                      |       |
|               |                  | exc.      |                |    |    |    |    |                      |       |
| A3<br>(n=20)  | IAM              | def.      |                |    |    |    |    |                      |       |
|               |                  | exc.      |                |    |    |    |    |                      |       |
|               | TPM              | def.      |                |    |    |    |    |                      |       |
|               |                  | exc.      |                |    |    |    |    |                      |       |
|               | SMM              | def.      |                |    |    |    |    |                      |       |
|               |                  | exc.      |                |    |    |    |    |                      |       |
| A4<br>(n=76)  | IAM              | def.      |                |    |    |    |    |                      |       |
|               |                  | exc.      |                |    |    |    |    |                      |       |
|               | TPM              | def.      |                |    |    |    |    |                      |       |
|               |                  | exc.      |                |    |    |    |    |                      |       |
|               | SMM              | def.      |                |    |    |    |    |                      |       |
|               |                  | exc.      |                |    |    |    |    |                      |       |

IAM: Infinite allele model; TPM: Two-phase model; SMM: Stepwise mutational model.  
*exc.*= Significant *He* excess; *def.*= Significant *He* deficiency

**Partitioned BOTTLENECK analysis:** *Imp.*= MS with imperfect and/or interrupted repeats. *Perf.*= Ms with perfect repeats

**Overall BOTTLENECK simulation results**

|            | A1          | A2          | A3          | A4           |
|------------|-------------|-------------|-------------|--------------|
| <b>IAM</b> | <i>exc.</i> | <i>exc.</i> | <i>exc.</i> | -            |
| <b>TPM</b> | -           | <i>exc.</i> | <i>exc.</i> | <i>def.*</i> |
| <b>SMM</b> | <i>def.</i> | -           | -           | <i>def.</i>  |

\*Sig. *He* deficiency present only when proportion of SSM was increased to 95% in TPM

Refs.

- (1) Cornuet JM, Luikart G (1996) Description and power analysis of two tests for detecting recent population bottlenecks from allele frequency data. *Genetics* 144: 2001-2014.
- (2) Piry S, Luikart G, Cornuet J-M: BOTTLENECK: A Computer Program for Detecting Recent Reductions in the Effective Population Size Using Allele Frequency Data. 1999.
